# Supplementary material for: Total Phenolic Content, Antioxidant Capacity and UV Radiation Protection Properties of Marigold (Calendula officinalis), Carrot (Daucus carota), Tomato (Solanum lycopersicum) and Hop (Humulus lupulus) Extracts
Source: MDPI journal article supplement (doi:10.3390/cosmetics9060134), 2022-12-05
Supplement: s1 [file s1]

The graphs of the dependence of the sun protection factor on the concentration of the tomato extracts are placed in supplementary.

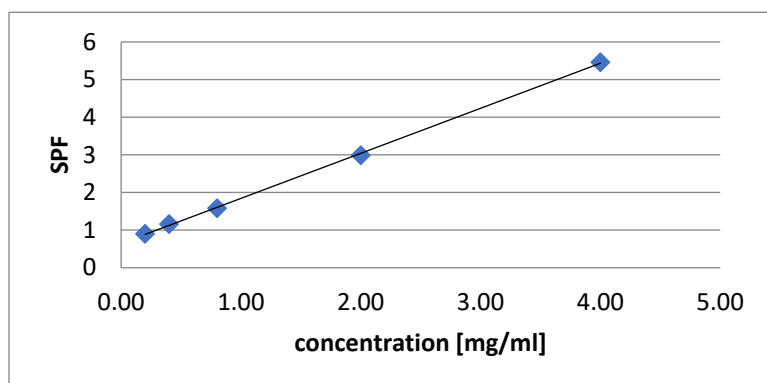

**Figure S1.** The dependence of the protection factor on the concentration of the tomato water extracts.

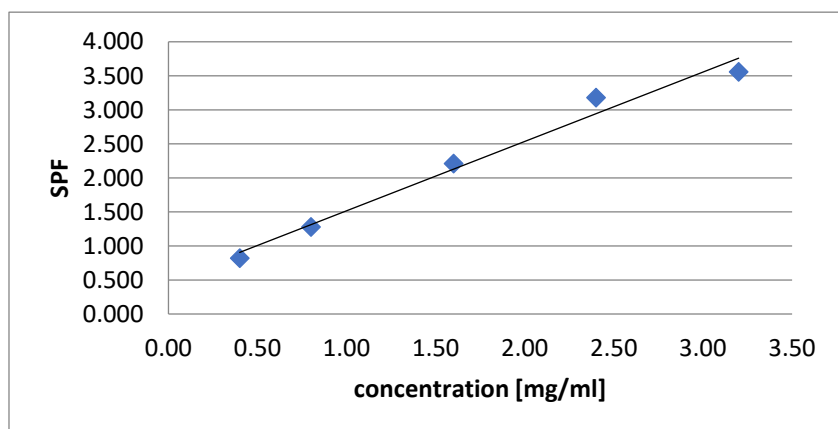

**Figure S2.** The dependence of the protection factor on the concentration of the tomato water-glycol extracts.

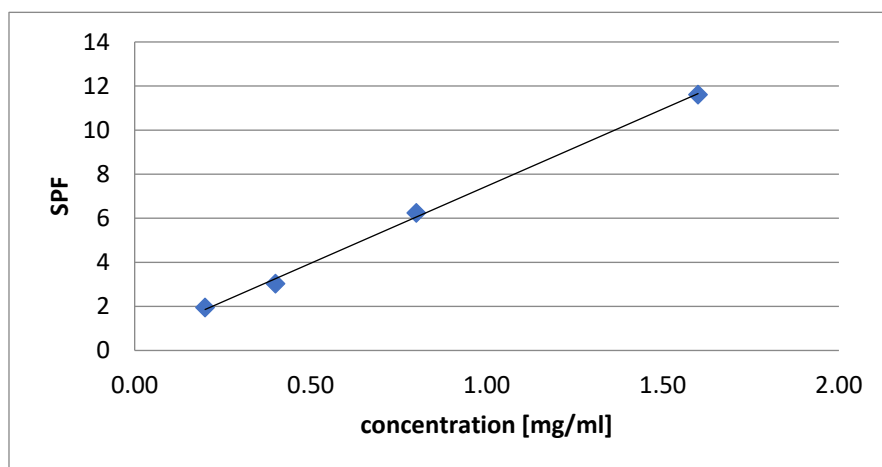

**Figure S3.** The dependence of the protection factor on the concentration of the tomato oil extracts.
