# Supplementary material for: Total Phenolic Content, Antioxidant Capacity and UV Radiation Protection Properties of Marigold (Calendula officinalis), Carrot (Daucus carota), Tomato (Solanum lycopersicum) and Hop (Humulus lupulus) Extracts
Source: MDPI journal article supplement (doi:10.3390/cosmetics9060134), 2022-12-05
Supplement: s1 [file s1]

Archive with 1 entries (1 files):
- cosmetics-2022101-supplementary.pdf
